# Supplementary material
Source: PubMed Central journal article supplement (PMC4772155)
Supplement: NIHMS758835-supplement-Supplemental_files.pdf [file NIHMS758835-supplement-Supplemental_files.pdf]

## Supplementary Materials

Supplemental figure 1

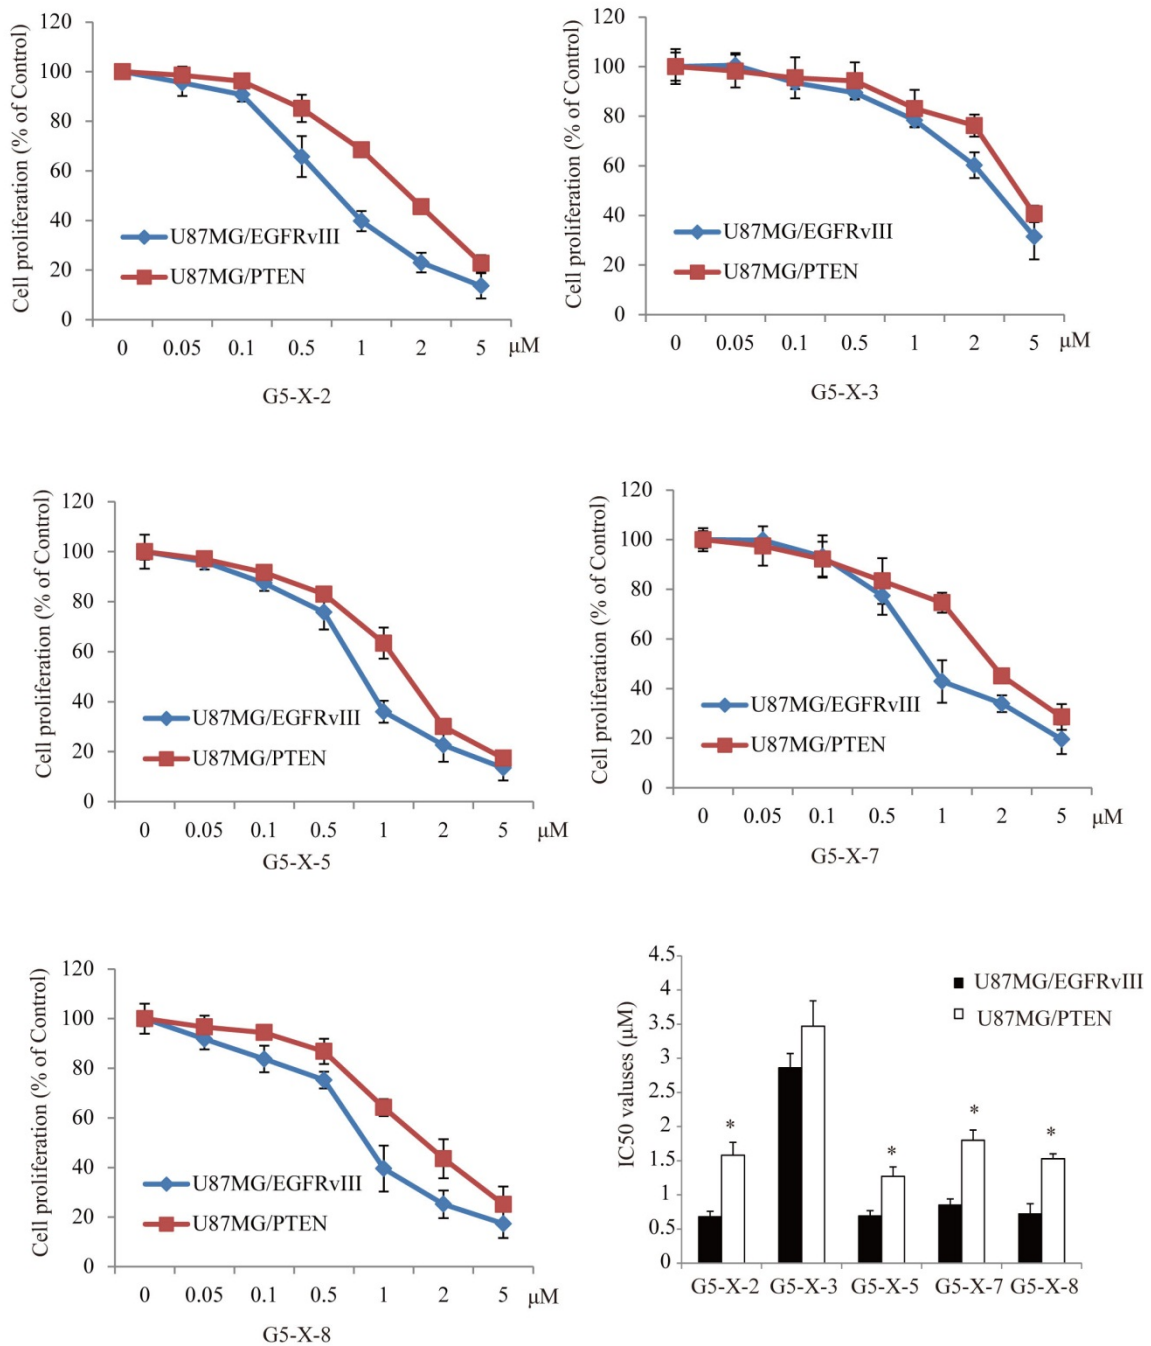

**Figure S1. Effect of G5-7 derivatives (G5-X-2, -3, -5, -7, -8) on the proliferation of U87MG/EGFRvIII and U87MG/PTEN cells. Cells were treated with different doses of G5-7**

for 96 hours and then were analyzed with the MTT cell proliferation assay. Data are shown as mean and S.E.M., (n = 3 experiments, \*  $P < 0.05$ , \*\*  $P < 0.01$ , U87MG/EGFRvIII vs.

U87MG/PTEN, two-way ANOVA)

Supplemental figure 2

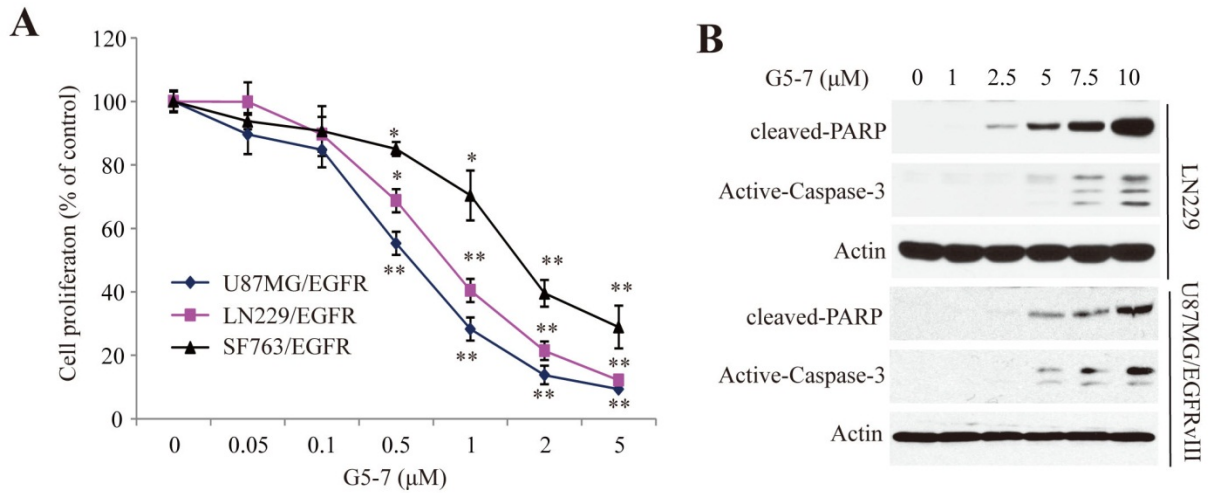

**Figure S2. G5-7 suppresses human GBM in vitro.** **A.** G5-7 inhibits EGFR overexpressed GBM cells in a dose-dependent manner. The cells were treated with different dosage of G5-7 for 96 hours followed by an MTT assay. Except for U87MG/EGFR, the proliferation of EGFR stable transfected LN229 and SF273 cells were inhibited in a dose-dependent manner by G5-7. Data were expressed as mean  $\pm$  S.E.M. (n = 3 experiments, \*  $P < 0.05$ , \*\*  $P < 0.01$ , one-way ANOVA). **B.** G5-7 induces apoptosis in cancer cells. LN229 and U87MG/EGFRvIII cells were treated with different doses of G5-7 for 24 hours. The cell lysates were analyzed by different antibodies. G5-7 triggered apoptosis in a dose-dependent manner.

**A**

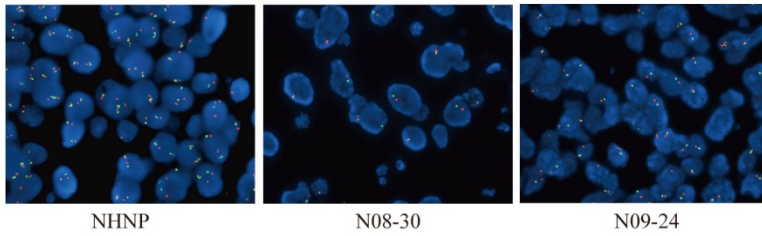

**B**

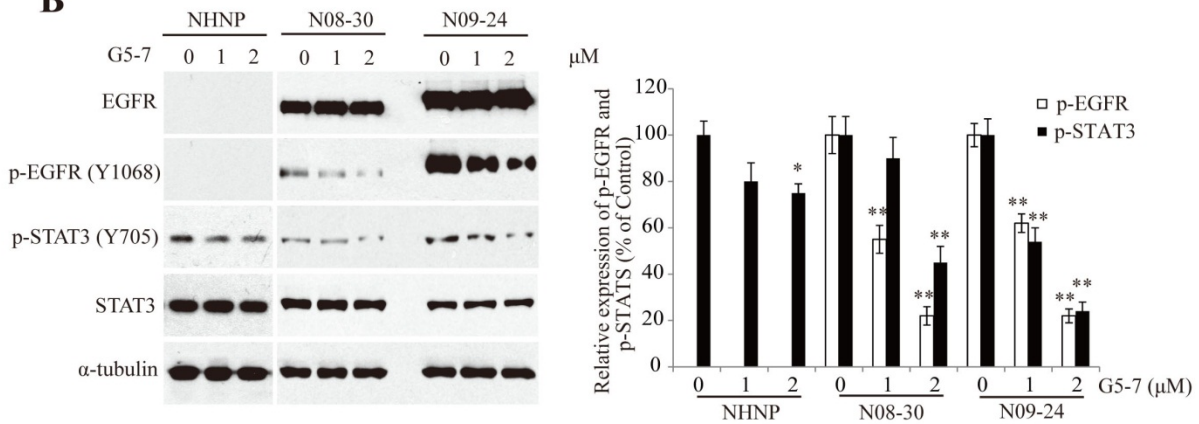

**Figure S3. Effect of G5-7 on N09-24 and N08-30 neurospheres.** **A.** PTEN status in NHNP, N09-24, and N08-30 neurospheres. FISH assay on the PTEN locus (10q23.3) showed that both of the tumor samples used to create the neurosphere cell lines had *PTEN* loss compared with NHNP. The red probe is for the PTEN locus and the green probe is for the CEP10 (centromere). **B.** G5-7 inhibits EGFR and STAT3 phosphorylation in N09-24 and N08-30 neurospheres. Different doses of G5-7 incubated with the neurosphere for 6 hours. The lysates were analyzed by immunoblotting with various antibodies. P-EGFR and p-STAT3 were quantitatively analyzed against control samples (n = 3 experiments, \*  $P < 0.05$ , \*\*  $P < 0.01$ , one-way ANOVA).

Supplemental figure 4

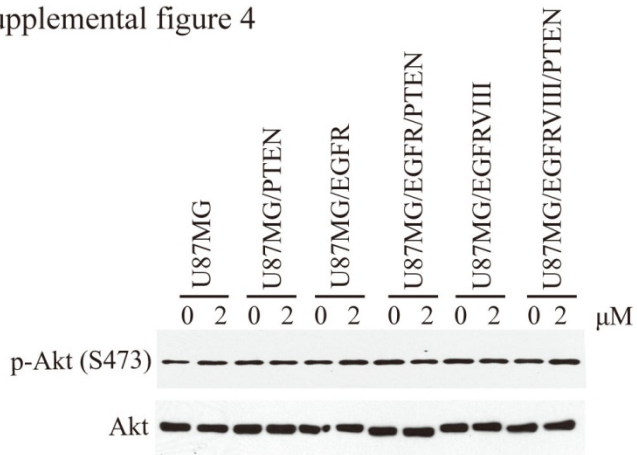

**Figure S4. Effect of G5-7 on p-Akt expression in U87MG isogenic cell lines.** Cells treated with G5-7 (2  $\mu$ M) for 6 hours, the lysates were analyzed by immunoblotting with p-Akt (S473) antibody.

Supplemental figure 5

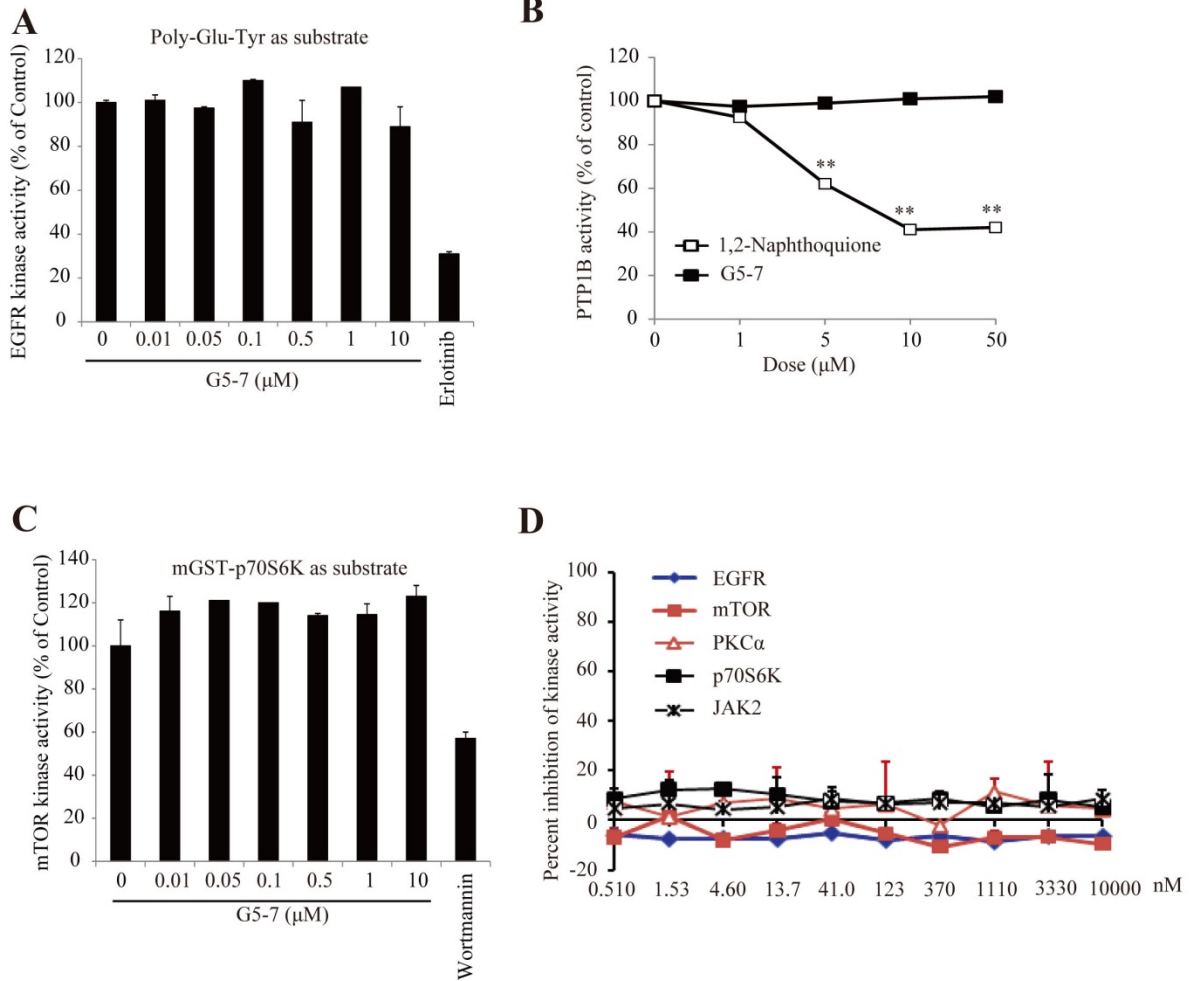

**Figure S5. G5-7 does not directly block PTP1B, EGFR, and mTOR kinase activity. A.** EGFR in vitro kinase assay. The phosphorylated PGT was measured by ELISA with anti-p-Tyr-HRP antibody. **B.** In vitro PTP1B assay. PTP1B protein was pre-incubated with different concentrations of G5-7 or 1, 2-Naphthoquinone for 20 minutes on ice. The reaction was initiated after addition of 4 mM pNPP and lasted 30 minutes at 30 °C. Data were shown as mean  $\pm$  S. E. M. (n = 3 experiments, \*  $P < 0.05$ , \*\*  $P < 0.01$ , one-way ANOVA). **C.** mTOR in vitro kinase assay. The phosphorylation of p70<sup>S6K</sup> was measured by ELISA with anti-p-p70S6K 389 antibody. **D.** G5-7 does not inhibit the kinase domain's activity from EGFR, JAK2, mTOR, PKC $\alpha$  and p70S6K kinases. The kinases were selected for the in vitro kinase assay (Invitrogen,

SelectScreen™ Kinase Profiling) with different concentrations of G5-7 and 10  $\mu$ M ATP. Data were shown as mean  $\pm$  S. E. M. (n = 3 experiments, one-way ANOVA).

Supplemental figure 6

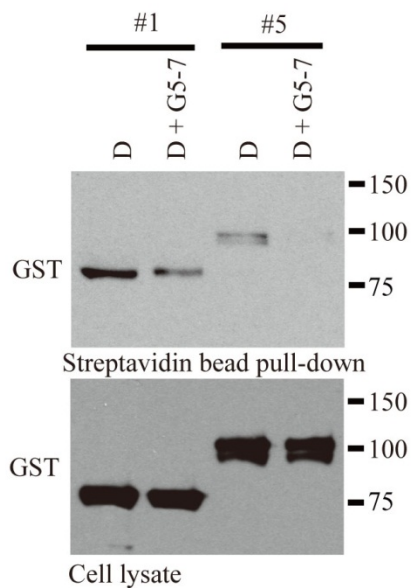

**Figure S6. Confirmation of the binding of G5-7 and JAK2.** Biotin-streptavidin pull-down assay. Following transfecting GST-JAK2 (A.A.1-543, fragment #1) or GST-JAK2 (A.A.1-806, fragment #5) into HEK293 cells, cell lysate were collected. Then biotin-labeled G5-7 (D, final concentration 5  $\mu$ M) and G5-7 (final concentration 50  $\mu$ M) or vehicle was added into equal amount of lysate (total protein 1 mg). Biotin-labeled G5-7-associated proteins were pulled down with NeutrAvidin beads and analyzed by immunoblotting analysis.

Supplemental figure 7

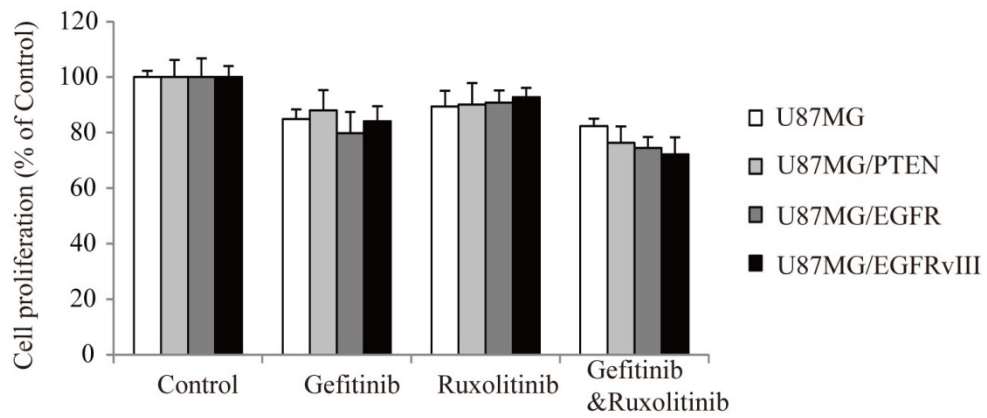

**Figure S7. Effect of gefitinib and ruxolitinib on proliferation of U87MG/EGFRvIII and U87MG/PTNE cells.** Cells were treated with gefitinib (10  $\mu$ M) or ruxolitinib (200 nM) or their combination for 96 hours followed by an MTT assay.

Supplemental figure 8

**A**

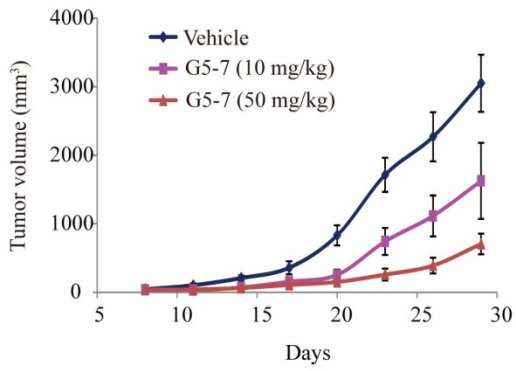

**B**

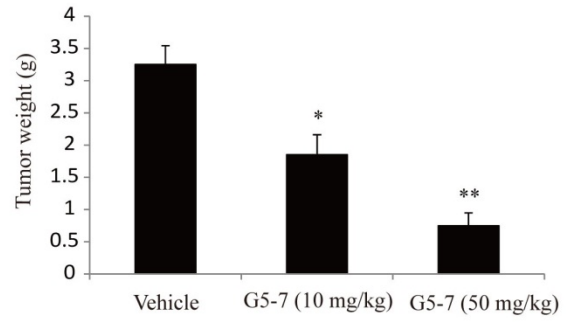

**C**

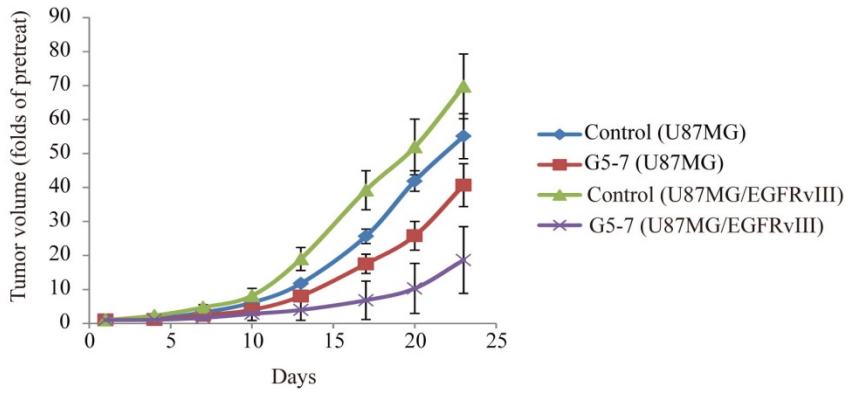



**Figure S8. G5-7 blocks tumor growth of U87MG/EGFRvIII in subcutaneous model.**

**A & B.** G5-7 significantly inhibits the growth of U87MG/EGFRvIII xenograft tumors.

U87MG/EGFRvIII cells were inoculated subcutaneously in the flank of nude mice, and after the tumors were formed, the nude mice were orally injected with vehicle (0.5% methylcellulose) or G5-7 at doses of 10 and 50 mg/kg (n=7-8/group) for 21 days. Data represent mean  $\pm$  S. E. M.

(\* $P < 0.05$ , \*\* $P < 0.01$ , one-way ANOVA, n=3). **C.** G5-7 selectively inhibits the growth of U87MG/EGFR xenograft tumors compared to that of U87MG xenograft tumors (n=7-8/group). Data represent mean  $\pm$  S. E. M.

Supplementary figure 9

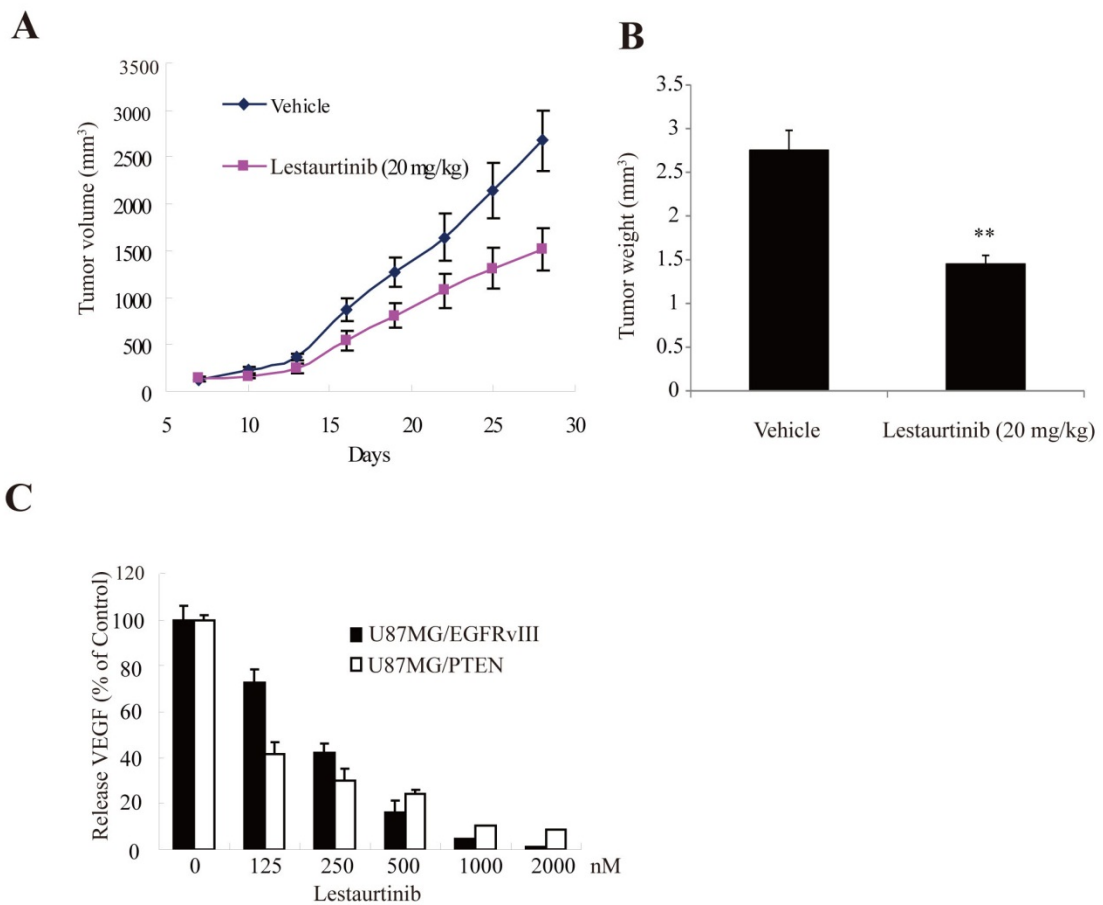

**Figure S9. Lestaurtinib inhibits U87MG/EGFRvIII tumor growth in subcutaneous model.**

**A & B.** Lestaurtinib blocks the growth of U87MG/EGFRvIII subcutaneous xenograft tumors in mice. U87MG/EGFRvIII cells were inoculated subcutaneously in the flank of nude mice. After the tumors were formed, the nude mice were orally injected with vehicle (Gelucire: propylene glycol as 3:1) or lestaurtinib at a dose of 20 mg/kg (n=6/group) for 21 days. Data of tumor volume in (A) and tumor weight in (B) represent mean  $\pm$  S. E. M. (\* $P$ < 0.05, \*\* $P$ < 0.01, one-way ANOVA, n = 3). **C.** Lestaurtinib inhibits VEGF secretion in a dose-dependent manner. U87MG/EGFRvIII and U87MG/PTEN cell lines were treated with different doses of lestaurtinib for 24 hours and the VEGF released in the medium was measured with a human VEGF ELISA kit.

Supplemental figure 10

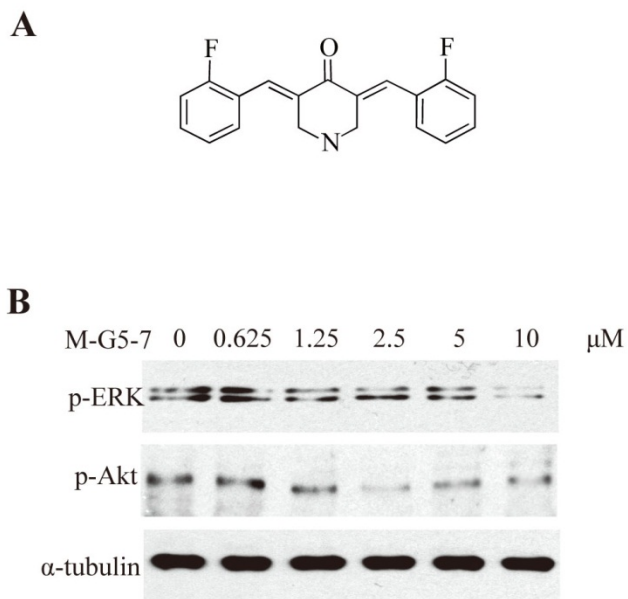

**Figure S10. Effect of the metabolite of G5-7 (M-G5-7) on p-Akt and p-ERK expression in U87MG/EGFRvIII cells. A.** Structure of M-G5-7. **B.** U87MG/EGFRvIII cells treated with

M-G5-7 at indicated concentrations for 6 hours, the lysates were analyzed by immunoblotting with various antibodies as indicated.

Supplemental figure 11

**A**

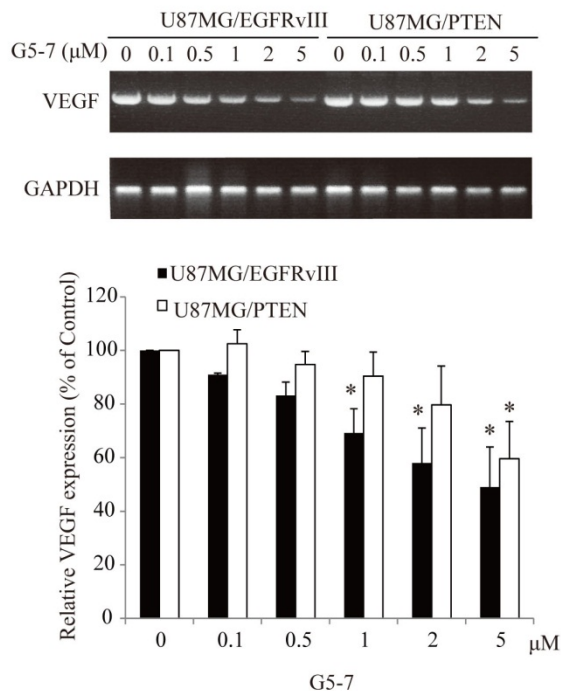

**B**

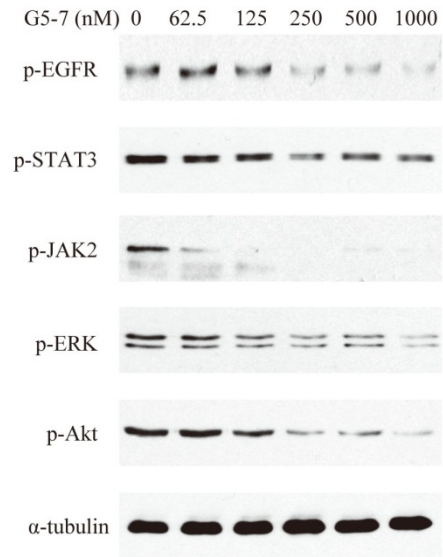

**Figure S11. Regulatory effect of G5-7 on VEGF mRNA level and invasion/migration related signaling.** **A.** G5-7 suppresses VEGF expression at mRNA level in U87MG/EGFRvIII and U87MG/PTEN cells. The cells were treated with indicated concentrations of G5-7 for 24 hours, and then RT-PCR analysis was employed. Quantification was carried out with Image J software. Data represent mean  $\pm$  S. E. M. (\* $P$  < 0.05, one-way ANOVA, n=3). **B.** G5-7 dose-dependently suppresses JAK2/EGFR/STAT3 signaling, as well as Akt and ERK activation. HUVEC cells were treated with indicated concentrations of G5-7 for 6 hours; the lysates were analyzed by immunoblotting with various antibodies as indicated.

Supplemental figure 12

**A**

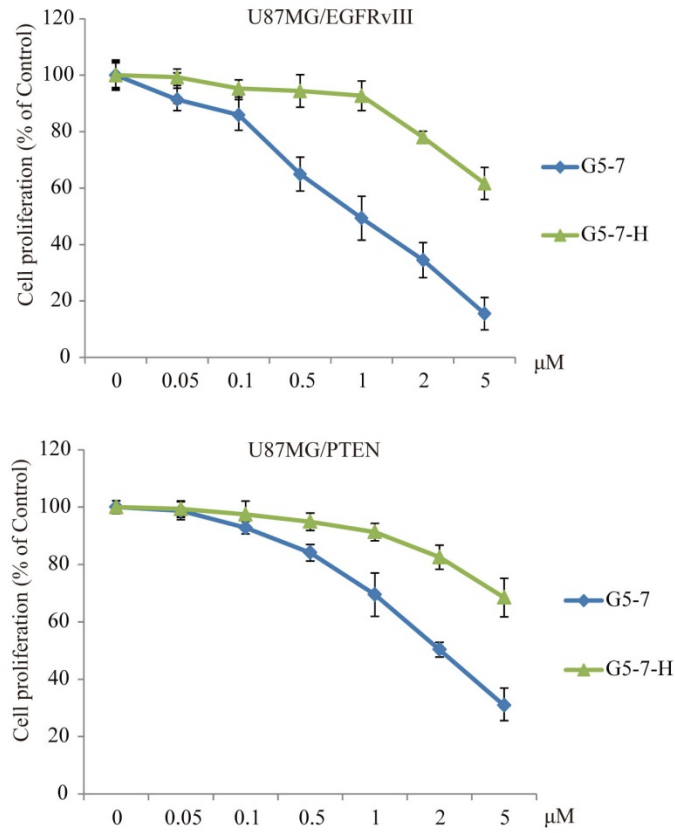

**B**

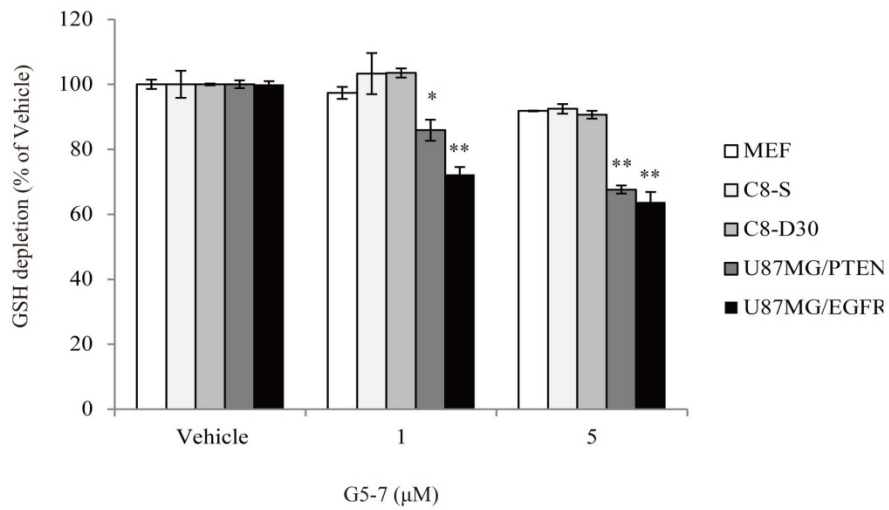

**Figure S12. Effect of G5-7 on GSH depletion in different kinds of cells and effect of G5-7-H on cell proliferation in U87MG/EGFRvIII and U87MG/PTEN cells.** **A.** Effect of G5-7-H on cell proliferation in U87MG/EGFRvIII and U87MG/PTEN cells. The cells were treated with different dosage of G5-7 for 96 h followed by an MTT assay. **B.** U87MG/EGFRvIII, U87MG/PTEN, C8-S, C8-D30 and MEF cells were treated with the indicated concentrations of G5-7 for 5 hours, followed by GSH depletion analysis. Data were expressed as mean  $\pm$  S.E.M. (n = 3 experiments, \*  $P < 0.05$ , \*\*  $P < 0.01$ , vs. Vehicle, one-way ANOVA).

Supplemental figure 13

**A**

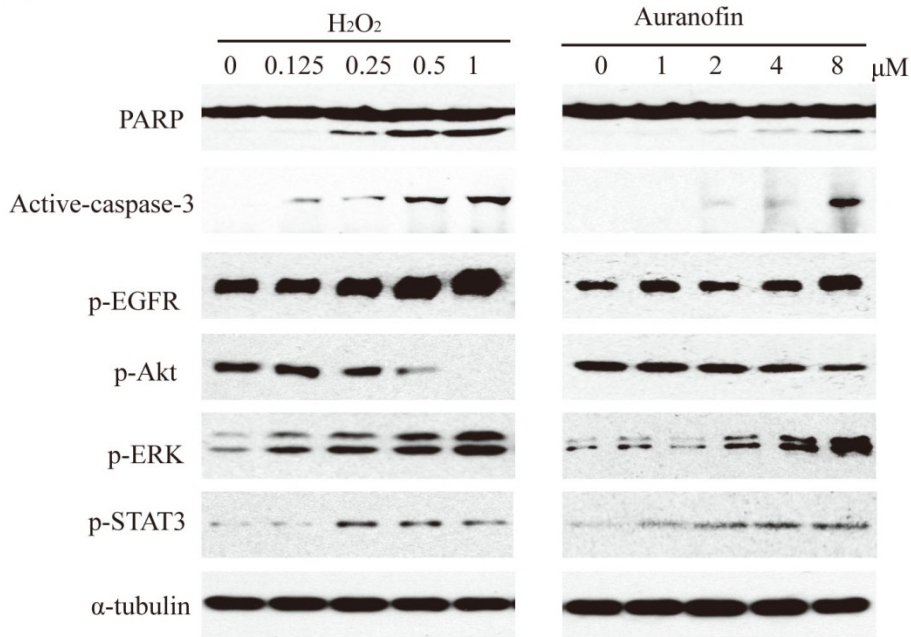

**B**

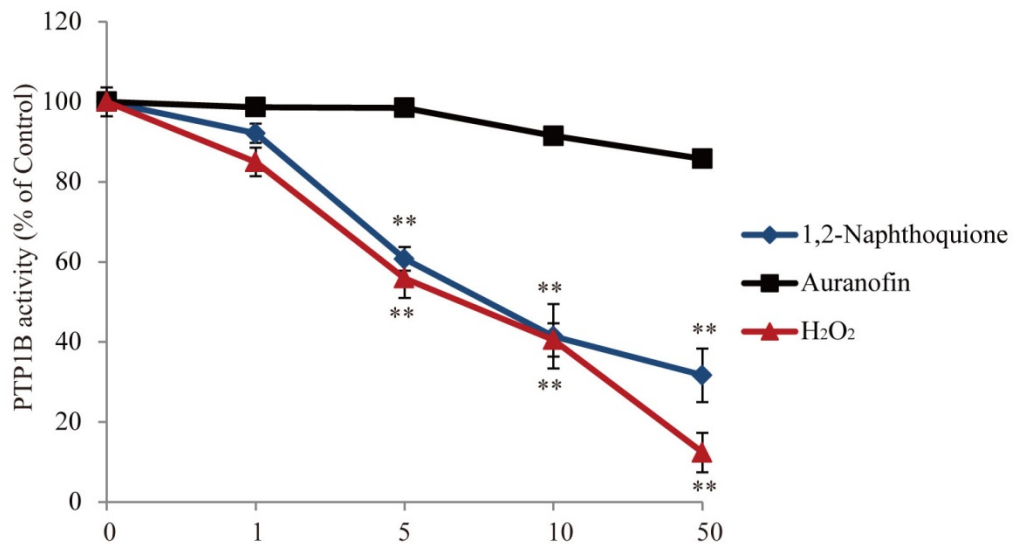

**Figure S13. Effect of hydrogen peroxide (H<sub>2</sub>O<sub>2</sub>) and Auranofin on p-EGFR, p-Akt, p-ERK, p-STAT3 expression in U87MG/EGFRvIII cells and on PTP1B activity in vitro. A.**

U87MG/EGFRvIII cells treated with H<sub>2</sub>O<sub>2</sub> or auranofin at indicated concentrations 6 hours, the



lysates were analyzed by immunoblotting with various antibodies as indicated. **B.** in vitro PTP1B activity assay. (n = 3 experiments, \*  $P < 0.05$ , \*\*  $P < 0.01$ , one-way ANOVA).

Supplemental figure 14

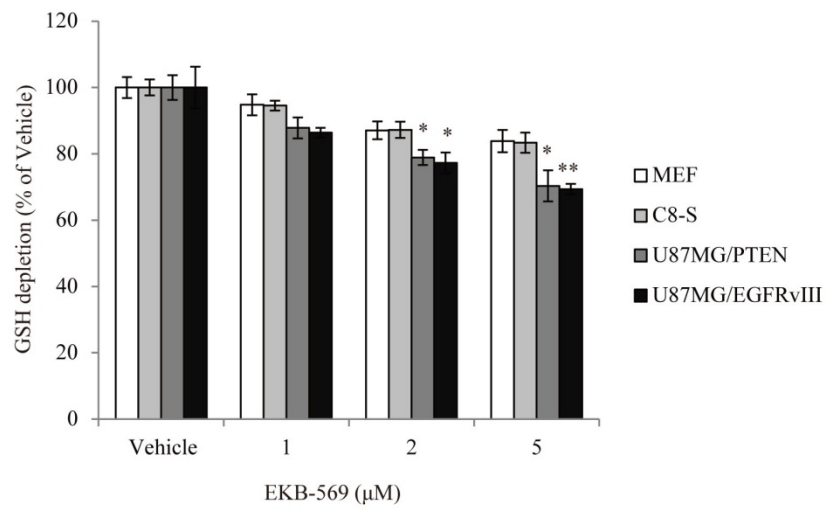

## Figure S14. Effect of EKB-569 on GSH depletion in different kinds of cells.

U87MG/EGFRvIII, U87MG/PTEN, C8-S, and MEF cells were treated with the indicated concentrations of EKB-569 for 5 hours, followed by GSH depletion analysis. Data were expressed as mean  $\pm$  S.E.M. (n = 3 experiments, \*  $P < 0.05$ , \*\*  $P < 0.01$ , vs. Vehicle, one-way ANOVA)

## Table S1. Chemical structures of G5-7 derivatives.

Supplemental table 1 Chemical structures of G5-7 derivatives.

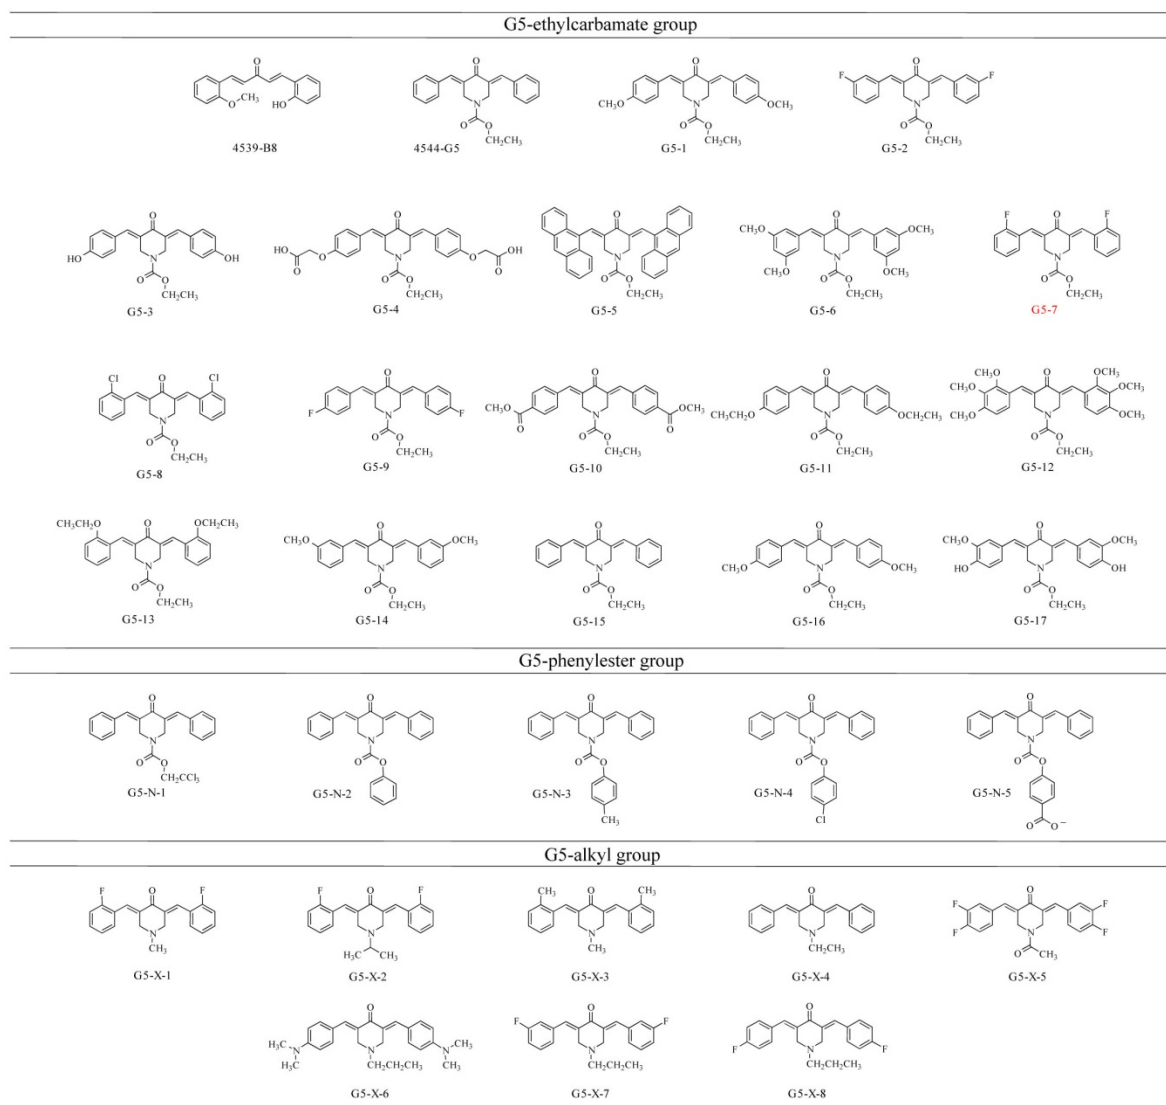

**Table S2. The kinase profiling of G5-7.**

A panel of kinases was selected for the in vitro kinase profile screening (Invitrogen, SelectScreen™ Kinase Profiling). These assays employed the kinase domain recombinant proteins with 10  $\mu$ M G5-7, 10  $\mu$ M ATP or 100  $\mu$ M ATP, if it is the available lowest concentration, and FRET (Fluorescence Resonance Energy Transfer)-peptide as substrates. The kinase assays were performed according to Invitrogen instructions.

Supplemental table 2

| Kinase tested            | % of inhibition | SD | Kinase tested                        | % of inhibition | SD |
|--------------------------|-----------------|----|--------------------------------------|-----------------|----|
| ABL1                     | -6              | 1  | MAPK3 (ERK1)                         | -3              | 11 |
| ADRBK1 (GRK2)            | -6              | 2  | MAPK8 (JNK1)                         | -3              | 11 |
| AKT1 (PKB $\alpha$ )     | 11              | 4  | MARK1 (MARK)                         | -7              | 7  |
| ALK                      | -8              | 2  | MET (eMet)                           | -4              | 1  |
| AMPK A1/B1/G1            | 9               | 11 | MINK1                                | 38              | 14 |
| AURKA (Aurora A)         | 1               | 3  | MUSK                                 | 12              | 12 |
| AXL                      | -7              | 5  | NEK1                                 | -5              | 4  |
| BRAF                     | 4               | 1  | NTRK1 (TRKA)                         | -6              | 4  |
| CDC42 BPA (MRCKA)        | 8               | 13 | NTRK2 (TRKB)                         | -5              | 3  |
| CDK1/cyclin B            | -1              | 3  | PAK1                                 | 0               | 13 |
| CDK5/p25                 | 6               | 4  | PDGFRA (PDGFR $\alpha$ )             | 7               | 16 |
| CHEK1 (CHK1)             | 3               | 17 | PDK1                                 | 13              | 5  |
| CLK1                     | -3              | 1  | PHKG1                                | 14              | 22 |
| CSF1R (FMS)              | 4               | 3  | PIM1                                 | 17              | 11 |
| CSNK1A1 (CK1 $\alpha$ 1) | -6              | 8  | PKN1 (PRK1)                          | 10              | 4  |
| DNA-PK                   | 0               | 5  | PLK1                                 | -6              | 2  |
| DYRK1A                   | -7              | 3  | PRKACA (PKA)                         | 0               | 0  |
| EEF2K                    | 8               | 5  | PRKCA (PKC $\alpha$ )                | 18              | 9  |
| EGFR (ErbB1)             | -4              | 3  | PRKG1                                | -12             | 9  |
| EPHA1                    | -5              | 5  | PTK2 (FAK)                           | -3              | 3  |
| EPHB1                    | -1              | 5  | RAF1 (cRAF) Y340D Y341D              | -4              | 9  |
| ERBB2 (HER2)             | 1               | 3  | RET                                  | -4              | 2  |
| FER                      | 2               | 4  | ROCK1                                | 15              | 4  |
| FGFR1                    | 5               | 5  | RPS6KA1 (RSK1)                       | 1               | 3  |
| FLT1 (VEGFR1)            | -1              | 2  | RPS6KA5 (MSK1)                       | 12              | 11 |
| FRAP1 (mTOR)             | -10             | 2  | RPS6KB1 (p70S6K)                     | 10              | 8  |
| FRK (PTK5)               | -14             | 3  | SGK (SGK1)                           | 6               | 11 |
| FYN                      | 8               | 1  | SRC                                  | 2               | 7  |
| GRK4                     | 7               | 1  | SRPK1                                | 1               | 0  |
| GSK3A (GSK3 $\alpha$ )   | -1              | 2  | SRPK2                                | 0               | 6  |
| HCK                      | -52             | 26 | STK4 (MST1)                          | 1               | 4  |
| HIPK1 (Myak)             | -9              | 1  | ZAP70                                | -1              | 2  |
| IGF1R                    | -19             | 4  | CAMK1 (CaMK1)                        | 3               | 5  |
| IKBKB (IKK $\beta$ )     | -5              | 0  | CHUK (IKK $\alpha$ )                 | -2              | 12 |
| INSR                     | -6              | 6  | DAPK1                                | -5              | 7  |
| JAK1                     | 2               | 3  | IRAK1                                | 0               | 11 |
| KIT                      | 14              | 7  | LRRK2                                | 8               | 4  |
| LCK                      | -9              | 6  | PI4KA (PI4K $\alpha$ )               | 1               | 2  |
| LTK (TYK1)               | 0               | 3  | PIK3C2A (PI3K-C2 $\alpha$ )          | -6              | 19 |
| MAP2K1 (MEK1)            | 0               | 2  | PIK3CA/PIK3R1 (p110 $\alpha$ /p85 a) | -7              | 5  |
| MAP2K2 (MEK2)            | -8              | 3  | PIK3CD/PIK3R1 (p110 $\delta$ /p85a)  | 16              | 7  |
| MAPK14 (p38 $\alpha$ )   | 9               | 10 | PIK3CG (p110 $\gamma$ )              | 11              | 2  |

**Table S3. Complete blood count of vehicle and G5-7-treated mice.**

C57BL/6J mice were orally treated with G5-7 (50 mg/kg) for 30 days and the blood was collected for complete blood count (CBC). The parameters of blood chemistry and biochemistry in G5-7-treated animals are within normal ranges, comparable to vehicle-treated mice.

Supplemental table 3

| Parameter                                 | Vehicle          | G5-7 (50 mg/kg)   | Normal range |
|-------------------------------------------|------------------|-------------------|--------------|
| WBC ( $\times 10^3/\mu\text{l}$ )         | 3.15 $\pm$ 1.16  | 3.98 $\pm$ 1.3 1  | 1.8 -10.7    |
| Neutrophils ( $\times 10^3/\mu\text{l}$ ) | 0.32 $\pm$ 0.09  | 0.68 $\pm$ 0.2 9  | 0.1 -2.4     |
| Neutrophils (% in WBC)                    | 10.8 $\pm$ 1.23  | 16.8 $\pm$ 3.06   | 6.6 -38.9    |
| Lymphocytes ( $\times 10^3/\mu\text{l}$ ) | 2.58 $\pm$ 1.02  | 3.23 $\pm$ 1.07   | 0.9 -9.3     |
| Lymphocytes (% in WBC)                    | 80.40 $\pm$ 3.92 | 79.01 $\pm$ 2.7   | 55.8 -91.6   |
| Monocytes ( $\times 10^3/\mu\text{l}$ )   | 0.04 $\pm$ 0.01  | 0.14 $\pm$ 0.05   | 0.0 -0.4     |
| Monocytes (% in WBC)                      | 1.20 $\pm$ 0.19  | 3.38 $\pm$ 0. 5 8 | 0.0 -7.5     |
| Eosinophils ( $\times 10^3/\mu\text{l}$ ) | 0.13 $\pm$ 0.01  | 0.03 $\pm$ 0.0 1  | 0.0 -0.2     |
| Eosinophils (% in WBC)                    | 5.70 $\pm$ 3.19  | 0.74 $\pm$ 0.3    | 0.0 -3.9     |
| Basophils ( $\times 10^3/\mu\text{l}$ )   | 0.02 $\pm$ 0.01  | 0 $\pm$ 0         | 0.0 -0.2     |
| Basophils (% in WBC)                      | 0.80 $\pm$ 0.07  | 0 $\pm$ 0         | 0.0 -2.0     |
| RBC ( $\times 10^6/\mu\text{l}$ )         | 10.80 $\pm$ 0.66 | 8.00 $\pm$ 0. 3 8 | 6.36 -9.42   |
| Hemoglobin (g/dl)                         | 15.50 $\pm$ 0.31 | 11.9 $\pm$ 0. 2 6 | 11.0 -15.1   |
| Hematocrit (%)                            | 60.67 $\pm$ 1.40 | 38.8 $\pm$ 1. 2 2 | 35.1 -45.4   |
| MCV (fl)                                  | 57.60 $\pm$ 1.03 | 48.67 $\pm$ 2.80  | 45.4 -60.3   |
